# Supplementary material
Source: publisher figshare collection journal article supplement (https://sage.figshare.com/ndownloader/files/37570189)
Supplement: Supplementary file 1 [file 37570189]

**Supplementary Figure captions**

**Supplementary Figure 1.** Actual photograph of experimental setup for polishing tests.


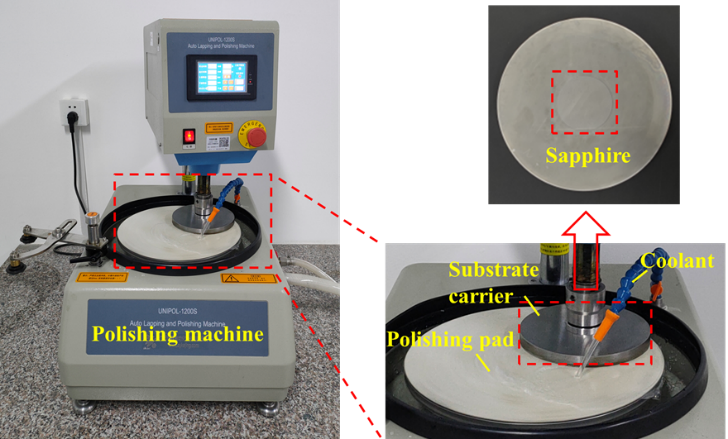


**Supplementary Figure. 1.** Actual photograph of experimental setup for polishing tests
